# Supplementary material
Source: publisher figshare collection journal article supplement (https://tandf.figshare.com/ndownloader/files/17563421)
Supplement: Supplementary file 1 [file 17563421]

**Table S6.** Risk of bias assessment of case-control studies and the authors' judgements about each downgraded study.

| Author, year         | Can we be confident in the exposure assessment? | Can we be confident in the PD diagnosis of cases? | Were the cases properly selected? | Can we be confident that the controls did not have PD or any other neurodegenerative disease?         | Were the controls properly selected? | Were cases and controls matched according to important prognostic variables or was statistical adjustment carried out for those variables? |
|----------------------|-------------------------------------------------|---------------------------------------------------|-----------------------------------|-------------------------------------------------------------------------------------------------------|--------------------------------------|--------------------------------------------------------------------------------------------------------------------------------------------|
| Case-control studies |                                                 |                                                   |                                   |                                                                                                       |                                      |                                                                                                                                            |
| Brouwer et al. 2017  | Probably yes.                                   | Probably not.<br>No mentioned criteria.           | Definitely yes.                   | Probably yes.                                                                                         | Probably yes.                        | Probably not.<br>The variable "duration of exposure" was not considered in the adjustments.                                                |
| Sanders et al. 2017  | Probably yes.                                   | Probably yes.                                     | Definitely yes.                   | Definitely not.<br>It was not clear whether controls had any other type of neurodegenerative disease. | Probably yes.                        | Probably not.<br>The variable "duration of exposure" was not considered in the adjustments.                                                |
| Tanner et al. 2011   | Probably yes.                                   | Definitely yes.                                   | Definitely yes.                   | Definitely yes.                                                                                       | Definitely yes.                      | Probably not.<br>The variable "duration of exposure" was not considered in the adjustments.                                                |

|                          |                                                                                                                                                     |                                               |                                                                                                                                                                                                        |                                                                                                                                                      |                 |                                                                                                                                    |
|--------------------------|-----------------------------------------------------------------------------------------------------------------------------------------------------|-----------------------------------------------|--------------------------------------------------------------------------------------------------------------------------------------------------------------------------------------------------------|------------------------------------------------------------------------------------------------------------------------------------------------------|-----------------|------------------------------------------------------------------------------------------------------------------------------------|
| Rugbjerg et al.<br>2011  | Probably not.<br>Although the<br>hygienist was<br>blinded, the PQ<br>exposure was not<br>detailed.                                                  | Probably yes.                                 | Definitely not.<br>Cases clearly selected<br>from different<br>populations: rural and<br>urban. Urban<br>populations might be<br>exposed to other<br>substances differently<br>than rural populations. | Definitely not.<br>It was not clear<br>whether controls had<br>any other type of<br>neurodegenerative<br>disease. Only PD<br>patients were excluded. | Probably yes.   | Definitely not.<br>Since the OR for paraquat<br>exposure was not calculated,<br>it was not possible to adjust<br>for any variable. |
| Firestone et al.<br>2010 | Probably not.<br>Self-reported<br>exposure; although<br>there was blinding of<br>assessors and<br>subjects, the PQ<br>exposure was not<br>detailed. | Probably yes.                                 | Definitely yes.                                                                                                                                                                                        | Probably yes.                                                                                                                                        | Probably yes.   | Probably not.<br>The variable “duration of<br>exposure” was not<br>considered in the<br>adjustments.                               |
| Tanner et al.<br>2009    | Probably not.<br>Self-reported<br>exposure; although<br>there was blinding of<br>subjects, the PQ<br>exposure was not<br>detailed.                  | Definitely not.<br>Parkinsonism investigated. | Probably not.<br>Different populations,<br>from two different<br>countries (USA and<br>Canada).                                                                                                        | Probably yes.                                                                                                                                        | Probably yes.   | Probably not.<br>The variable “duration of<br>exposure” was not<br>considered in the<br>adjustments.                               |
| Elbaz et al.<br>2009     | Probably yes.                                                                                                                                       | Probably yes.                                 | Probably yes.                                                                                                                                                                                          | Definitely yes.                                                                                                                                      | Definitely yes. | Probably yes.                                                                                                                      |

|                        |                                                                                                                                   |                                                                           |                                                                                                                                                       |                                                                                                                            |               |                                                                                             |
|------------------------|-----------------------------------------------------------------------------------------------------------------------------------|---------------------------------------------------------------------------|-------------------------------------------------------------------------------------------------------------------------------------------------------|----------------------------------------------------------------------------------------------------------------------------|---------------|---------------------------------------------------------------------------------------------|
| Dhillon et al.<br>2008 | Probably not.<br>The PQ exposure was not detailed.                                                                                | Probably not.<br>Only assessment of medical files; no criteria described. | Probably yes.                                                                                                                                         | Probably not.<br>Not clear whether they had any type of other neurodegenerative disorders. Only PD patients were excluded. | Probably yes. | Probably not.<br>The variable “duration of exposure” was not considered in the adjustments. |
| Kuopio et al.<br>1999  | Probably not.<br>The PQ exposure was not detailed.                                                                                | Definitely yes.                                                           | Definitely not.<br>Different populations: rural and urban. Urban populations might be exposed to other substances differently than rural populations. | Definitely yes.                                                                                                            | Probably yes. | Definitely not.<br>No adjustments for major confounding factors.                            |
| Liou et al. 1997       | Probably not.<br>Self-reported exposure; although there was blinding of subjects and assessors, the PQ exposure was not detailed. | Probably yes.                                                             | Definitely yes.                                                                                                                                       | Probably yes.                                                                                                              | Probably yes. | Probably yes.                                                                               |
| Seidler et al.<br>1996 | Probably not.<br>Self-reported exposure; although there was blinding of subjects, the PQ exposure was not detailed.               | Definitely yes.                                                           | Probably yes.                                                                                                                                         | Definitely not.<br>It was not clear whether controls had any type of other neurodegenerative disease.                      | Probably yes. | Probably not. The variable “duration of exposure” was not considered in the adjustments.    |

|                                |                                                                                                                                                     |               |               |                                                                                                                   |               |                                                                    |
|--------------------------------|-----------------------------------------------------------------------------------------------------------------------------------------------------|---------------|---------------|-------------------------------------------------------------------------------------------------------------------|---------------|--------------------------------------------------------------------|
| Hertzman et al.<br>1994        | Probably not.<br>Self-reported<br>exposure; although<br>there was blinding of<br>assessors, the PQ<br>exposure was not<br>detailed.                 | Probably yes. | Probably yes. | Probably not.<br>It was not clear<br>whether controls had<br>any type of other<br>neurodegenerative<br>disease.   | Probably yes. | Definitely not.<br>No adjustment for major<br>confounding factors. |
| Semchuk, Love,<br>and Lee 1992 | Probably not.<br>Self-reported<br>exposure; although<br>there was blinding of<br>subjects and<br>assessors, the PQ<br>exposure was not<br>detailed. | Probably yes. | Probably yes. | Definitely not.<br>It was not clear<br>whether controls had<br>any type of other<br>neurodegenerative<br>disease. | Probably yes. | Definitely not.<br>No adjustment for major<br>confounding factors. |

All answers as: definitely yes (low risk of bias), probably yes, probably no, definitely no (high risk of bias).
